# Supplementary material for: Chromosome-scale scaffolds of the fungus gnat genome reveal multi-Mb-scale chromosome-folding interactions, centromeric enrichments of retrotransposons, and candidate telomere sequences
Source: Springer Nature journal article supplement (doi:10.1186/s12864-025-11573-2), 2025-05-05
Supplement: MOESM1 [file 12864_2025_11573_MOESM1_ESM.pdf]

# Supplemental Materials

Chromosome-scale scaffolds of the fungus gnat genome reveal multi-Mb-scale chromosome-folding interactions, centromeric enrichments of retrotransposons, and candidate telomere sequences.

John M. Urban<sup>1</sup>, Susan A. Gerbi<sup>2#</sup>, Allan C. Spradling<sup>1#</sup>

<sup>1</sup> Carnegie Institution for Science, Department of Embryology, Howard Hughes Medical Institute Research Laboratories, 3520 San Martin Drive, Baltimore, MD, 21218, USA

<sup>2</sup> Brown University Division of Biology and Medicine, Department of Molecular Biology, Cell Biology and Biochemistry, Providence, RI 02912 USA

<sup>#</sup> Co-senior authors contributed equally to this work.

# Supplemental Figures

Supplemental Figure S1.

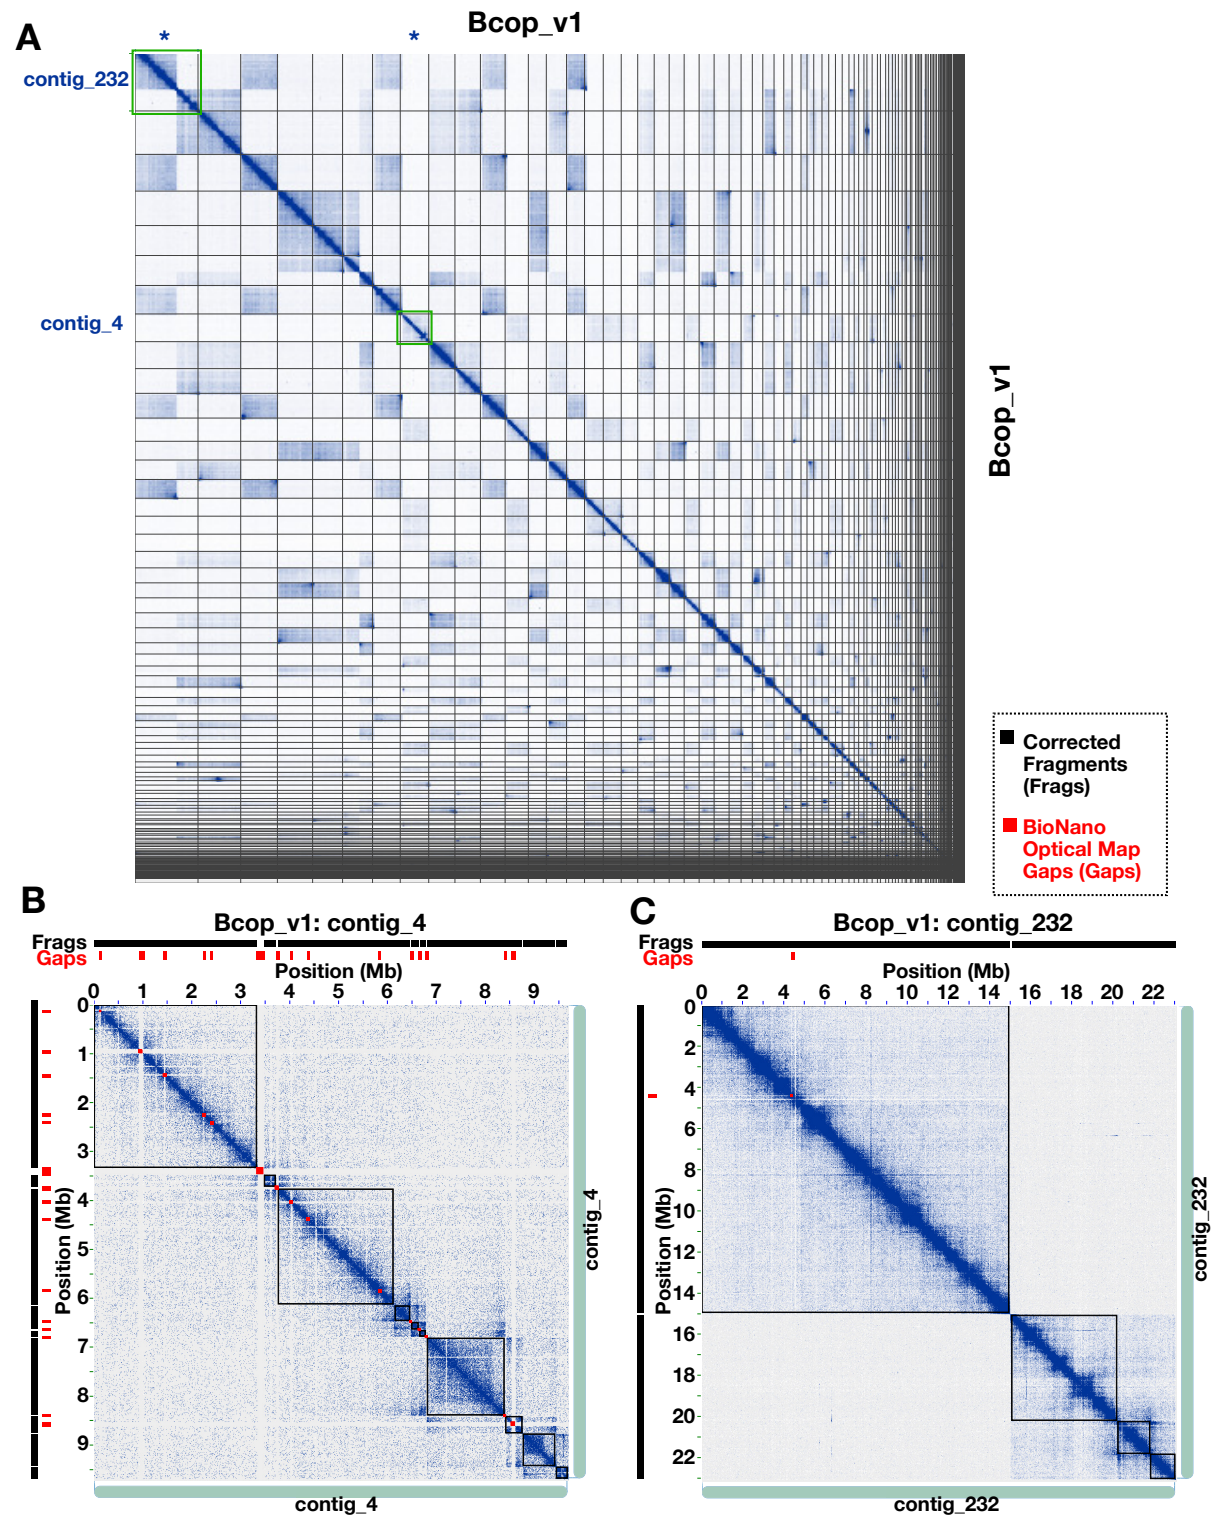

## **Supplemental Figure S1. Hi-C guided correction of contigs from Bcop\_v1.**

The paired-end Hi-C reads were first used to produce a corrected assembly (called “Bcop\_v1\_corrected”) by aligning them to the 205 primary contigs of Bcop\_v1 (“Bcop\_v1\_primary”) [1], then manually inspecting the Hi-C interaction frequency signal within the Bcop\_v1 contigs for disruptions in the expected pattern corresponding to putative mis-joined regions (**A-C**). (**A**) The entire Hi-C map of all primary scaffolds and contigs in Bcop\_v1 ordered from longest to shortest before correction and scaffolding. Scaffolds from B and C are highlighted by green boxes. Bcop\_v1 had 22 contigs with 46 such disruptions in the Hi-C signal (examples given in **B** and **C**, described below). The 22 contigs were “corrected” by breaking them into “sub-contigs” at the putative mis-joined regions. Of the 46 “debris” regions where breaks were made in Bcop\_v1 contigs, 32 were adjacent to BioNano optical map gaps (example in **B**), i.e. regions joined together previously by BioNano optical maps in Bcop\_v1, with gap lengths ranging from ~4.4 to ~674 kb. However, of the 156 BioNano gaps in Bcop\_v1, there were 124 ranging from 25 bp to ~400 kb that were conserved after the correction step, 70 of which were on the same 22 contigs that had “debris” regions and 54 that were elsewhere within Bcop\_v1. Thus, the regions joined by BioNano optical maps mostly did not present as putative mis-joins. Lower mapping quality from flanking repeats around BioNano gaps may have simply given rise to spurious Hi-C signals more often than random. In summary, the majority of mis-join signals (~70%) flanked a minority of assembly gaps, and mis-join signals affected a minority of contigs (10.7%) that were broken up by Hi-C-guided correction. This step transformed the input assembly (Bcop\_v1\_primary) that had 205 contigs into the corrected assembly (Bcop\_v1\_corrected), which had 297.

(**B**) Shows example of disrupted Hi-C signals related to joins made by scaffolding with BioNano Genomics optical maps and associated gaps. This is contig\_4, a ~9.7 Mb contig with 14 optical map gaps that was broken into 10 corrected fragments with the 9 breaks correlated with gap

locations. New corrected contigs are outlined by black squares and optical map gaps are represented by red squares. Both are also displayed above and to the left of the Hi-C map. The bottom and right show seafoam-colored bars representing the full original Bcop\_v1 contig.

**(C)** Example of disrupted Hi-C signal that occurred independent of optical map gaps within contiguous sequence. The Hi-C signal forms two obvious sequences that interact within themselves but that are significantly depleted of interactions with each other. The black squares outline the new contigs after correction. The self-interacting sequence on the bottom right has additional Hi-C signals that suggested possible structural errors; hence it being broken up into additional fragments. Fragments, optical map gaps, and the original contig are outlined and represented as in B.

Supplemental Figure S2.

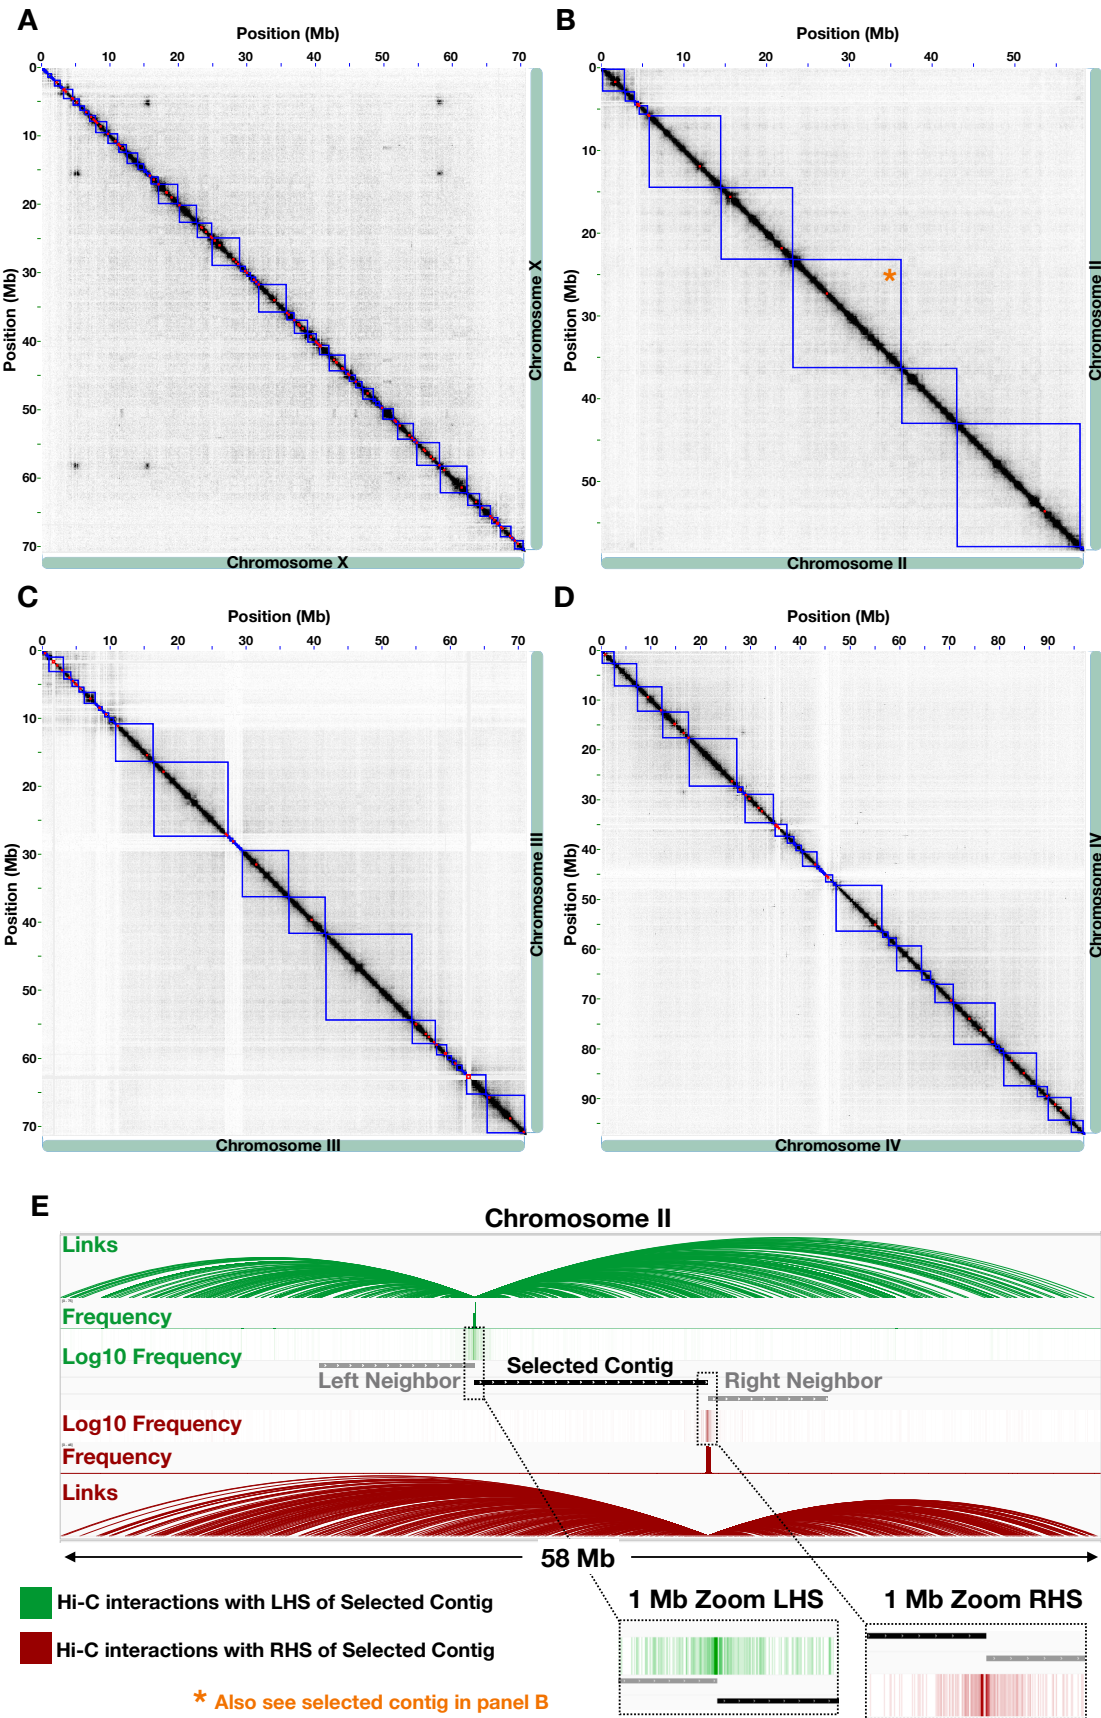

**Supplemental Figure S2. Hi-C signal shows high ‘chromosome specificity’ and ‘structural accuracy’ of the chromosome-scale scaffolds.**

The Hi-C signal across Bcop\_v2 was manually inspected to ensure that these metrics were optimized according to expected interaction frequency patterns. First, intra-chromosomal interaction frequencies are expected to exceed inter-chromosomal interaction frequencies [2]. As such, for high ‘chromosome specificity’, the same should be true for interaction frequencies within scaffolds compared to between scaffolds. Second, within a chromosome, interaction frequencies are expected to be highest between adjacent loci and to decay with distance along the linear chromosome sequence [2]. As such, for high ‘structural accuracy’ within a given scaffold, short distances should have the highest interaction frequencies both within contigs and also between adjacent ends of neighboring contigs within the scaffold. The former was ensured in the previous pre-scaffolding “correction” step and the latter will hold true if the contigs were ordered and oriented correctly. In Figure 2A of the main paper, we showed that before scaffolding, the regions of high and low interaction frequencies are all over the map for the input into scaffolding (Bcop\_v1\_corrected) where contigs are simply ordered from longest to shortest. Then in Figure 2B of the main paper, we showed that after Hi-C scaffolding, the contigs are ordered such that those regions of high average interaction frequencies are confined within four chromosome-sized scaffold squares along the diagonal and the regions of lowest interaction frequency correspond to inter-scaffold contacts. This indicates that the contigs within a given scaffold correspond to the same chromosome and that different scaffolds correspond to different chromosomes. Here we zoom in on the individual chromosome-scale scaffolds to inspect the contigs and contig ordering that defines them.

**(A, B, C, D)** Interaction frequencies across the X, II, III, and IV chromosome scaffolds, respectively. Blue squares correspond to individual contigs from Bcop\_v1\_corrected that make up the scaffolds. The asterisk in D corresponds to the selected contig in G. High structural accuracy

of Bcop\_v2 is indicated by the strong Hi-C interaction frequency signal along the diagonal within the chromosome scaffolds, with no disruptions between neighboring contigs, and by the weaker off-diagonal interaction frequencies that rapidly decay with distance.

**(E)** An example of the interaction frequencies between the ends of a selected contig and the rest of the chromosome-scale scaffold. The selected contig shown was from chromosome II (see asterisk in panel B). The selected contig is colored black whereas the two neighboring contigs are grey. Links (arcs) tracks correspond to a summary of loci that were linked together by paired-end reads where at least one mate maps to the given contig end. The “Frequency” tracks are bar plots corresponding to the number of times each bin across the chromosome was linked to the given contig end. However, interaction frequency decays exponentially with distance. Thus, the “Log10 Frequency” across the chromosome is also shown as a heatmap, and zoom-ins of the Log10 Frequency heatmaps in 1 Mb regions centered on each contig end are shown for higher resolution. Green and red tracks correspond to interactions and interaction frequencies with the left end and the right end of the selected contig, respectively. In general, several contigs were selected for the analysis highlighted in **E**. For the start (or end) of each contig inspected, compared to than any other region of any other contig within the scaffold, there were orders of magnitude more interactions with (i) the immediately adjacent terminal of the nearest neighboring contig, and (ii) the immediately adjacent flanking region within the same contig (example in **E**). Overall, these results indicate that the adjacent contigs within a given scaffold correspond to adjacent loci in the chromosome according to the logic of Hi-C. LHS and RHS stand for left-hand side and right-hand side, respectively.



## Supplemental Figure S3.

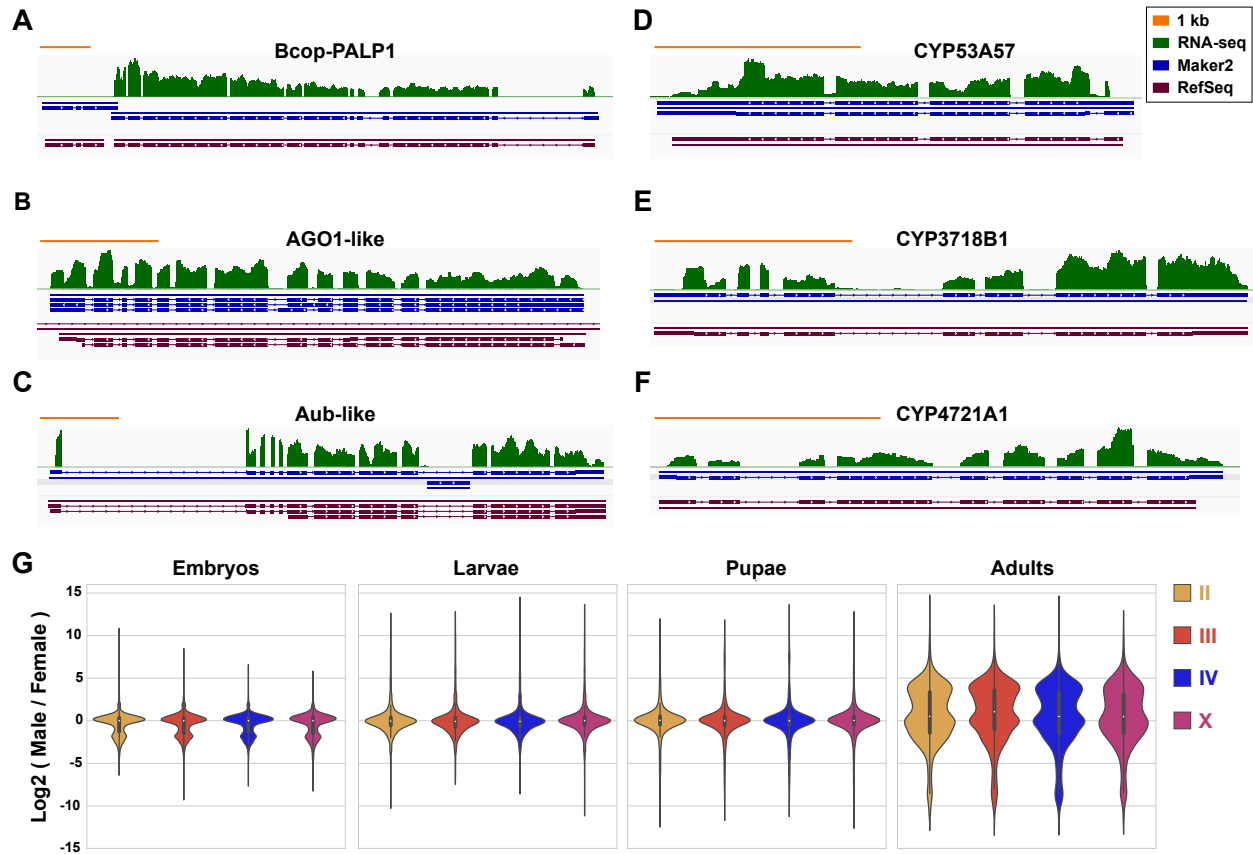

### Supplemental Figure S3: Analysis of gene models on Bcop\_v2 lifted over from Bcop\_v1 gene annotation sets.

Two high quality gene annotation sets defined on the earlier version of the reference genome, Bcop\_v1, were lifted over to the updated chromosome-scale reference, Bcop\_v2. Both gene annotation sets had similar lift-over success rates for all metrics (Table 4). Using the Maker2 annotation set as an example, of the 23,117 genes and 28,870 transcripts, only 2 genes with 4 transcripts were not mapped to Bcop\_v2. Of the 28,866 transcript models successfully lifted over to Bcop\_v2, all but one (28,865) had perfect full-length alignments to the original transcript sequences, although 52 (<0.2%) were a bit shorter than the original. In total, only 53 transcript sequences had differences in the updated genome assembly (Table 4). Even fewer, just 49 transcripts, had differences at the level of protein sequence, which is to say that nearly all (99.83%) had identical protein sequences between assemblies (Table 4). An even higher percent at the gene level was identical between assemblies. For example, 99.87% of lifted-over genes had identical



protein sequences for all transcript isoforms, and 99.91% had identical protein sequences for all or at least a subset of transcript isoforms (Table 4). In addition to these analyses, we confirmed that RNA-seq coverage was concordant with the exons and introns of lifted over gene models.

**(A-F)** Example Bcop\_v1 gene models were chosen to show concordance with RNA-seq datasets after liftover to Bcop\_v2. For simplicity, only one RNA-seq dataset is shown (irradiated fourth instar pre-eyespot larvae, replicate 1 [3]). However, lifted over gene models were consistent with all RNA-seq datasets checked, including those from all life stages and both sexes used in the original gene annotation [1]. RNA-seq concordance is illustrated here using genes of interest from recent *B. coprophila* studies, including **(A-C)** PARP and Argonaute family genes that arose in response to radiation [3], and **(D-F)** example “alien” cytochrome P450 genes [4]. For all six gene panels **(A-F)**, as summarized in the pictorial legend box on the top right: the orange scale bar represents 1 kb, the green trace (top level) shows RNA-seq coverage, the blue gene models (middle level) are from Maker2 [1, 5], and the purple gene models (bottom level) are from NCBI RefSeq [1, 6]. In all cases, the RNA-seq trace shows genome-wide coverage that was computed agnostic to the location of gene structures, and that was not artificially restricted to exons. Thus, the correspondence of higher RNA-seq coverage over exons shows that fidelity of the liftover process. The gene model examples shown for RNA-seq coverage are as follows, adorned with Maker2 (Bcop\_v1) [1, 5] and NCBI RefSeq (gene-LOC) [6] identifiers, either of which can be used with the lifted-over GFFs to find the coordinates in Bcop\_v2. Bcop-PALP1:

Bcop\_v1\_g007065; gene-LOC119085384. AGO1-like: Bcop\_v1\_g003309; gene-LOC119067568. Aub-like: Bcop\_v1\_g01302; gene-LOC119068172. CYP53A57: Bcop\_v1\_g020678; gene-LOC119075328. CYP3718B1: Bcop\_v1\_g007236; gene-LOC119074427. CYP4721A1: Bcop\_v1\_g009136; gene-LOC119078932.

**(G)** NCBI gene models lifted over to Bcop\_v2 were used for chromosome-specific differential expression analysis of RNA-seq data from males versus females across four life stages [1]. Log2

fold-changes are shown for genes grouped by chromosome-scale scaffolds. The distribution of male vs. female fold-changes across X-linked genes match the distributions across each autosomal chromosome rather having a 2-fold down-shifted X-linked fold-change distribution corresponding to the single male X chromosome compared to two in females. This indicates there is dosage compensation on the single male X as we and others found previously [1, 7].

## Supplemental Figure S4.

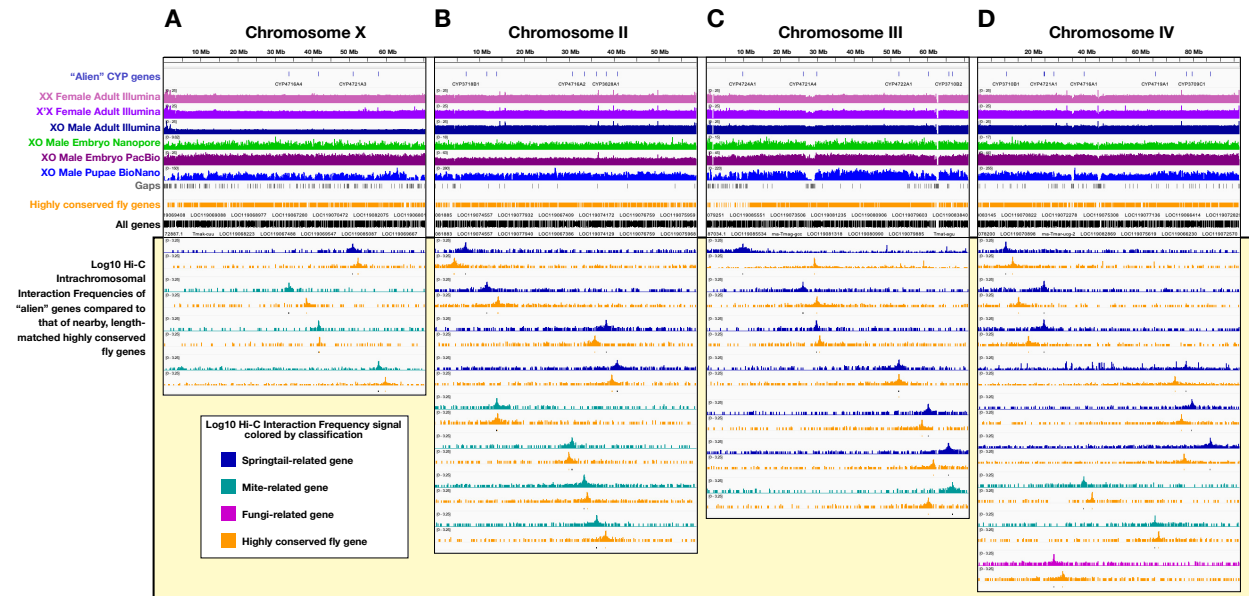

## Supplemental Figure S4: Diverse genomic datasets support the existence of “alien” genes within the chromosomes.

A recent paper found 28 “alien” genes from horizontal gene transfer (HGT) in the Bcop\_v1 gene annotations, 17 from springtails, 10 from mites, and 1 from fungi. They presented some evidence that these are not from contamination sources [4]. For example, the “alien” genes had homology and synteny in the genomes of closely related species from three different continents and had evidence of being expressed and spliced [4], which we also show for three such genes in Supplemental Fig. S3 D-F. The locations of the “alien” genes in the chromosome-scale scaffolds allowed a further investigation into the likeliness that these ‘alien’ genes are truly integrated into the chromosomes of *B. coprophila* with a variety of orthogonal genomic datasets, including Hi-C, long reads, and optical maps. As shown in A-D (i) they have typical Hi-C interaction frequencies that decay with distance, comparable in all cases to nearby ‘highly conserved fly genes’ of similar length, and (ii) there were no disruptions in sequencing depth seen over the “alien” gene regions across a variety of genomic datasets from different technologies and samples whereas disruptions were seen over gaps in the assembly as expected. Overall, the genes reported to be “aliens” by Feyersen et al [4] show no differences in coverage

or Hi-C interactions compared to highly conserved fly genes, demonstrating their existence inside the scaffolds is not a result of contamination and/or assembly errors.

IGV traces for chromosome **(A)** X, **(B)** II, **(C)** III, and **(D)** IV. From the top track downward, each shows the location of (1) “alien” CYP genes described by Feyersen et al [4], (2-7) coverage tracks from various genomic technologies and samples [1, 8], (8) gaps in the assembly where coverage signal is expected to drop, (9) locations of all highly conserved fly genes, and (10) locations of all genes. In each, the 11<sup>th</sup> track from the top and all tracks beneath it highlighted by the yellow box correspond to the log10 intrachromosomal interaction frequency (IIF) signal emanating from selected “alien” genes (dark blue, cyan, or magenta) or the closest by highly conserved fly gene that is approximately the same length (orange). All log10 IIF tracks have the same y-axis range (0-3.25), allowing direct comparison of peak heights and shapes. Under each pair of log10 IIF signals is a track showing the exact location of both genes.

Supplemental Figure S5.

**A**

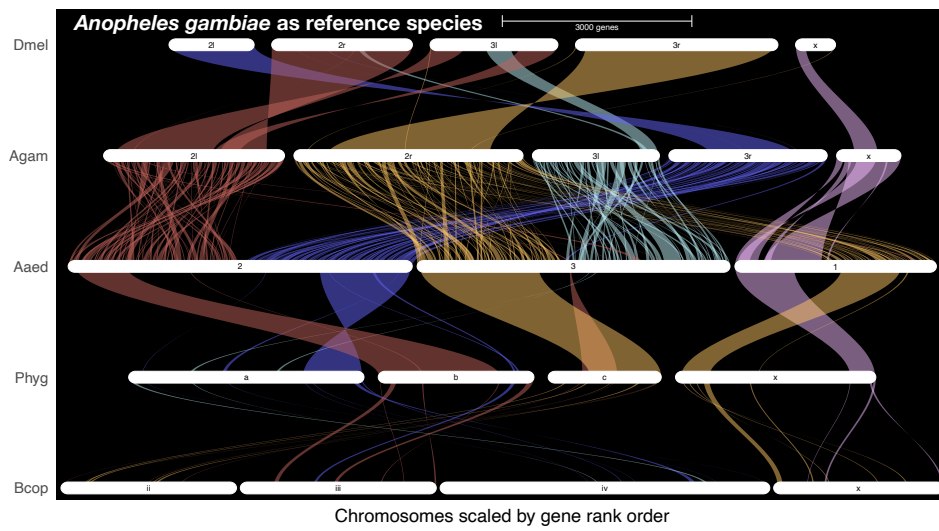

**B**

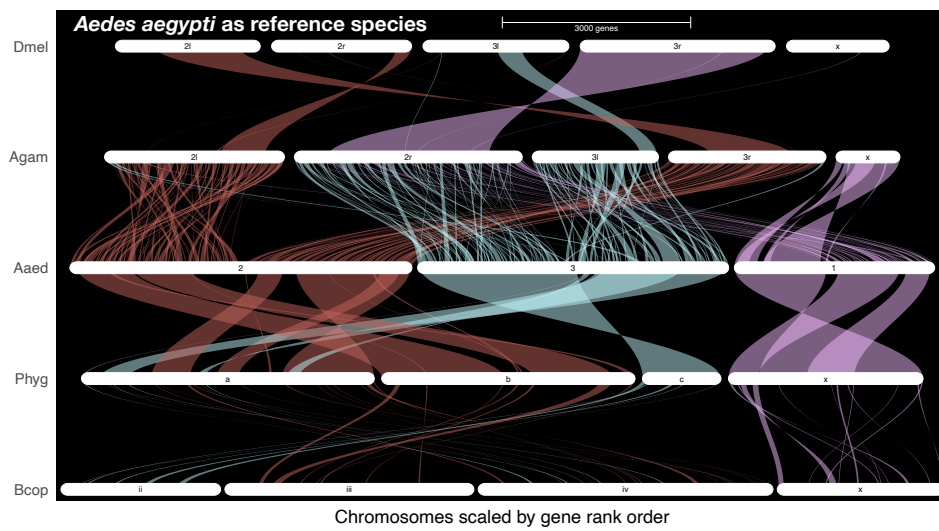

**C**

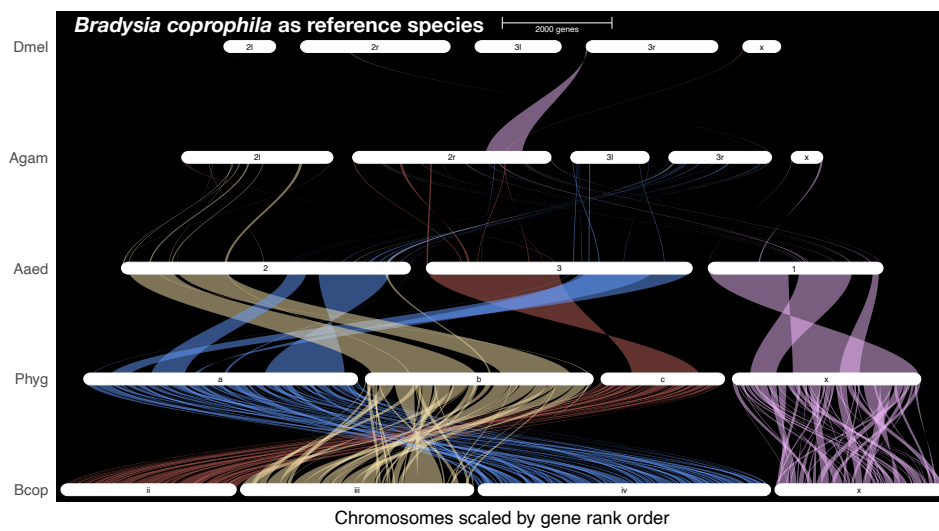

**Supplemental Figure S5. Riparian plots of syntenic blocks.**

(A) Riparian plot of syntenic block between the 5 species using *Anopheles gambiae* as the reference. (B) Riparian plot of syntenic block between the 5 species using *Aedes aegypti* as the reference. (C) Riparian plot of syntenic block between the 5 species using *Bradysia coprophila* as the reference. Using these three as references was sufficient to visually capture all the trends of syntenic blocks between species. Also see Fig. 3 and Table 5.

**Supplemental Figure S6. Most of the extra long-range dots in X'X female data are from structural differences between X and X', and are not found in the XO male data.**

**A**

**X'X Adult Female Hi-C Data**

Highlighting the top 25 structural variant dots from  
X'X gDNA control data.

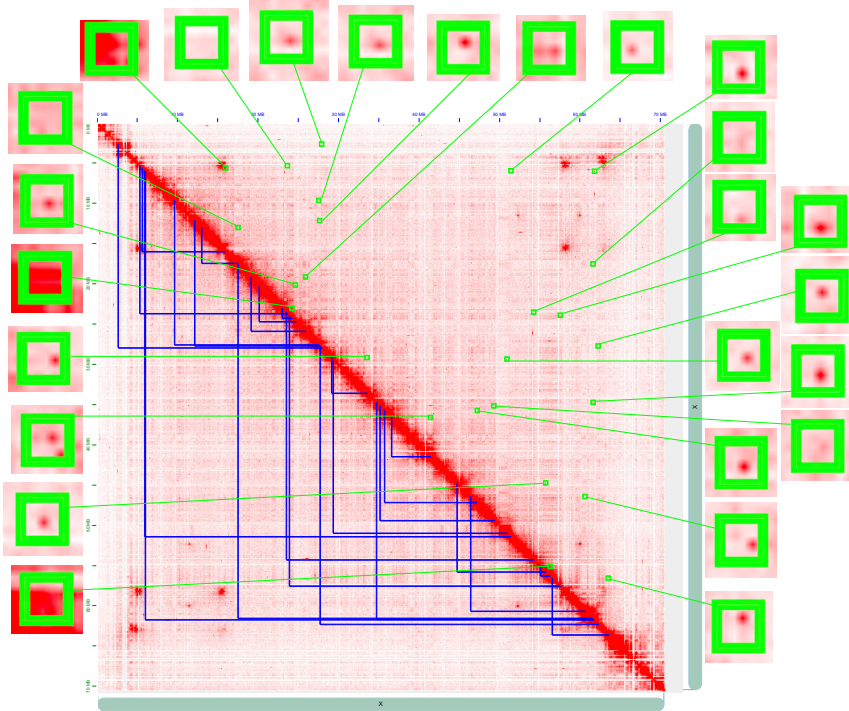

**B**

**XO Male Pupae Hi-C Data**

Highlighting the top 25 structural variant dots from  
X'X gDNA control data.

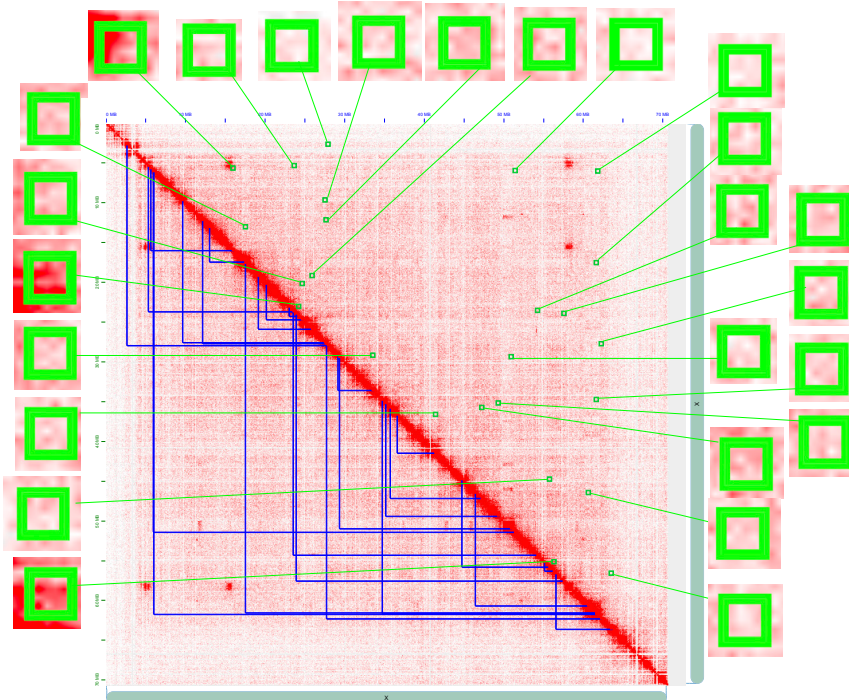

SV dots from X'X female data not detected in XO male data since X' not present.



**Supplemental Figure S6. Most of the extra long-range dots in X'X female data are from structural differences between X and X', and are not found in the XO male data.**

The X'X female Hi-C map has many additional off-diagonal dots than the XO male Hi-C map. We suspected this was due to structural differences between the X' and X chromosomes. We used regular X'X genomic DNA (gDNA) paired-end sequencing data from a recent study [8] with a similar approach of calling long-range (> 5 Mb) interaction peaks as done for identifying fold-back regions and inversion breakpoints in the X'X Hi-C data. This identified many of the extra dots on the X'X Hi-C map thought to be putative structural difference between the X' and X chromosomes. Here, the top 25 cluster peaks of gDNA SVs were used to annotate X'X and XO Hi-C plots to check how many off-diagonal dots are seen in each Hi-C map **(A)** X'X Adult Female Hi-C map with the 25 gDNA SV locations highlighted by green squares, which are also blown up around the perimeter of the Hi-C map. The majority of green squares (SV locations) have obvious visible dots inside them. A couple green squares do not, possibly due to smoothing or differences between the X'X gDNA and X'X Hi-C samples. **(B)** XO Male Pupae Hi-C map with the 25 gDNA SV locations highlighted by green squares as in (A). The X'X dots are not visible in XO male Hi-C data. The blue half-squares on the bottom-left half of the map show how the loci are connected, and the dots are covered by the corners. The green squares in the top-right half of the map are drawn around the dots of interest.

Supplemental Figure S7. Examples of 7 other putative long-range interactions on the X.

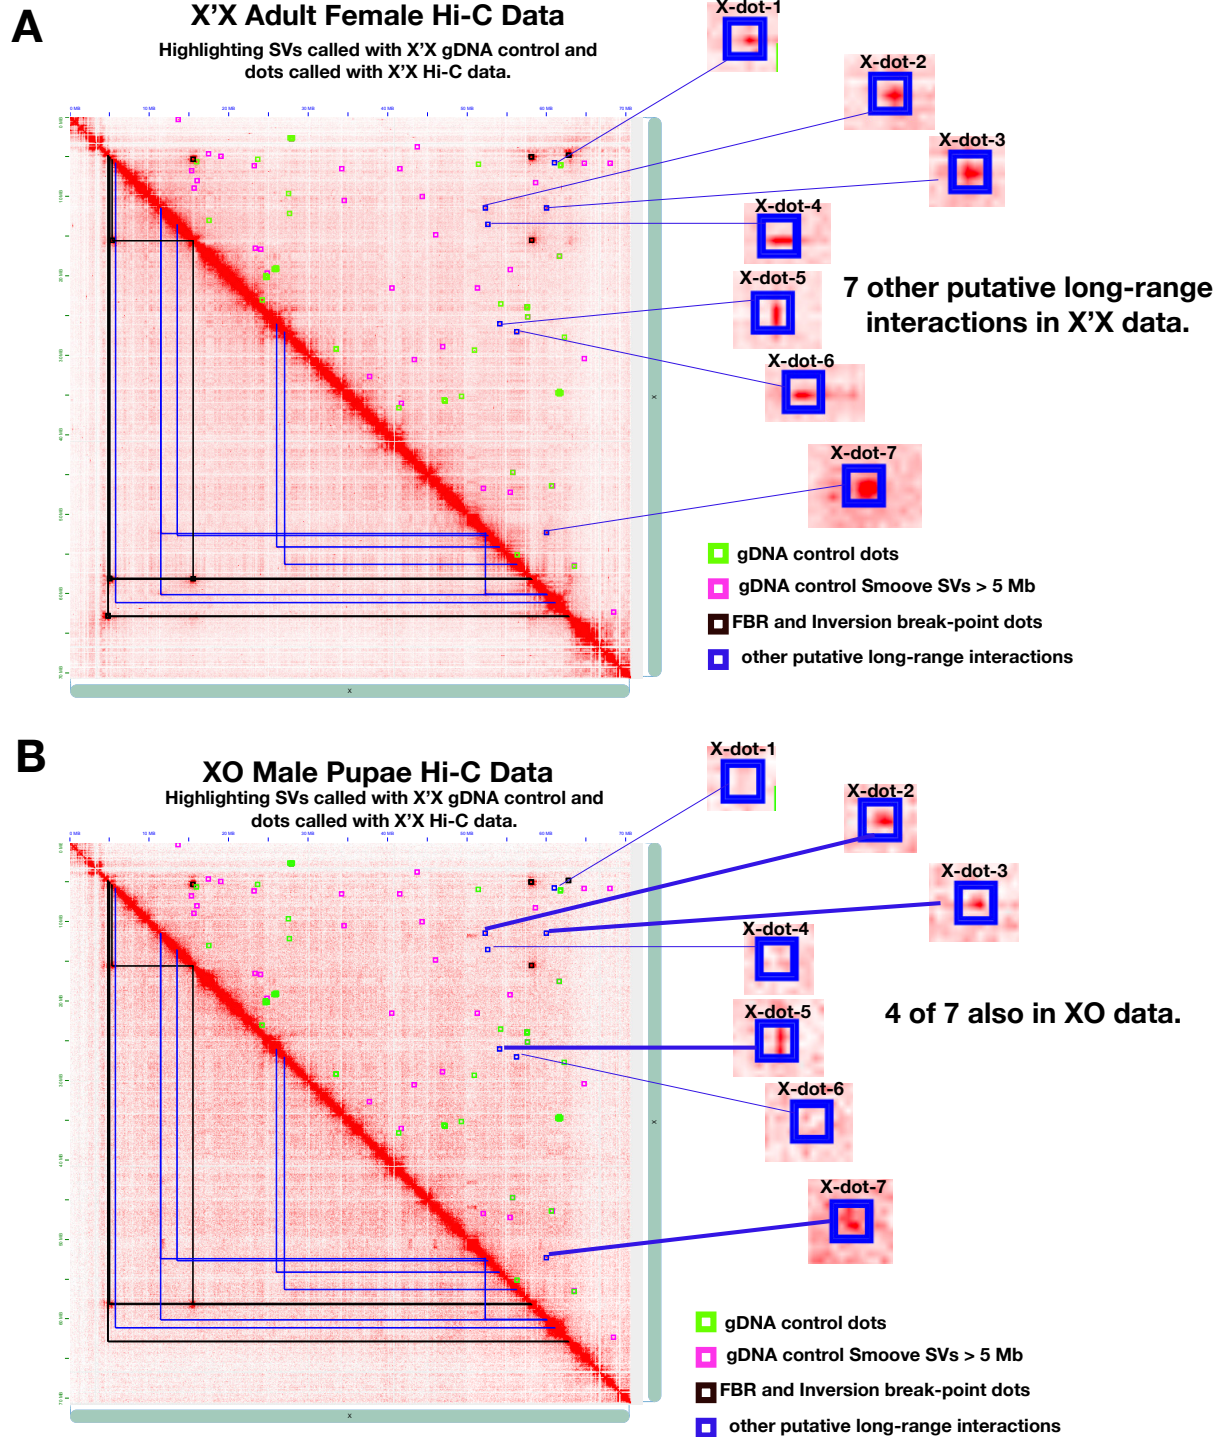

**Supplemental Figure S7. Examples of 7 other putative long-range interactions on the X.**

We searched for long-range interactions other than the strong, broad interactions demonstrated by the fold-back regions and long paracentric inversion breakpoints. First, many cluster peaks were called on the X'X Hi-C map. In addition, X'X genomic DNA control data was used to call structural variant cluster peaks similar to Supplemental Figure S7, but allowing up to 50 calls. In addition, structural variants in the X'X gDNA control data were called with Smoove/Lumpy [9, 10]. Then X'X Hi-C interactions were filtered to remove any possible SV as well as the FBR and long paracentric inversion regions. There were 7 dots that remained, 4 of which are also in the XO male data. **(A)** X'X Adult Female Hi-C map with FBR, long paracentric inversion breakpoint, SV locations, and extra putative long-range interactions highlighted. **(B)** XO Male Pupae Hi-C map highlighting the locations of FBR, long paracentric inversion breakpoint, SV locations, and extra putative long-range interactions, all of which were learned on the X'X datasets. The seven putative long-range interaction dots on the X are simply named X-dot 1-7. X-dot-2, X-dot-3, X-dot-5, and X-dot-7 were also seen in the male pupae Hi-C data. The blue half-squares on the bottom-left half of the map show how the extra dot loci are connected, and the black squares do the same for the fold-back regions and breakpoints for the long paracentric inversion. The squares in the top-right half of the map are drawn around the dots of interest, and colored by what they represent as shown in the legends. The blue squares are blown up to show the extra dot locations in both Hi-C datasets.

# Supplemental Tables

**Supplemental Table S1. Genes within broadly-defined FBR1 boundaries.**

| Chr | Start   | End     | ID           | Associated Functional Information                                     |
|-----|---------|---------|--------------|-----------------------------------------------------------------------|
| X   | 4635542 | 4692595 | LOC119069868 | neurexin-3a-like                                                      |
| X   | 4732320 | 4793358 | LOC119067090 | uncharacterized LOC119067090                                          |
| X   | 4798989 | 4802436 | LOC119067096 | lncRNA                                                                |
| X   | 4808800 | 4837292 | LOC119067083 | uncharacterized LOC119067083                                          |
| X   | 4840265 | 4841893 | LOC119067085 | beclin-1-like protein                                                 |
| X   | 4847876 | 4854355 | LOC119067074 | probable histone-lysine N-methyltransferase Mes-4                     |
| X   | 4862162 | 4865889 | LOC119067081 | FAST kinase domain-containing protein 4                               |
| X   | 4865845 | 4869812 | LOC119067079 | IQ and ubiquitin-like domain-containing protein                       |
| X   | 4881319 | 4894576 | LOC119067082 | protein phosphatase PP2A 55 kDa regulatory subunit                    |
| X   | 4896492 | 4899359 | LOC119067077 | TATA box-binding protein-associated factor RNA polymerase I subunit B |
| X   | 4903023 | 4919416 | LOC119067080 | inositol polyphosphate-5-phosphatase A                                |
| X   | 4920112 | 4922755 | LOC119067078 | extracellular xylan exo-alpha-(1->2)-glucuronosidase-like             |
| X   | 4933633 | 4936136 | LOC119067091 | max-like protein X                                                    |
| X   | 4936065 | 4937668 | LOC119067087 | tRNA:m(4)X modification enzyme TRM13 homolog                          |
| X   | 4939081 | 4940231 | LOC119067093 | transmembrane emp24 domain-containing protein 2                       |
| X   | 4948412 | 4951566 | LOC119067089 | 5-hydroxytryptamine receptor 1-like                                   |
| X   | 4955521 | 4996863 | LOC119067088 | 5-hydroxytryptamine receptor 1-like                                   |
| X   | 5016878 | 5076694 | LOC119067075 | mushroom body large-type Kenyon cell-specific protein 1               |
| X   | 5217451 | 5232532 | LOC119067094 | lncRNA                                                                |
| X   | 5261380 | 5279772 | LOC119067095 | lncRNA                                                                |
| X   | 5391430 | 5397915 | LOC119066998 | uncharacterized LOC119066998                                          |
| X   | 5440820 | 5451531 | LOC119066997 | uncharacterized LOC119066997                                          |
| X   | 5456715 | 5463343 | LOC119067026 | ras-related protein Rab-1A                                            |
| X   | 5470204 | 5475173 | LOC119067031 | chondroitin sulfate glucuronyltransferase                             |
| X   | 5476547 | 5490089 | LOC119067027 | ATP-binding cassette sub-family A member 3-like                       |
| X   | 5493693 | 5495585 | LOC119066995 | exosome complex component RRP45-like                                  |
| X   | 5508837 | 5519504 | LOC119067025 | plastin-1-like                                                        |
| X   | 5522843 | 5528958 | LOC119067010 | ER membrane protein complex subunit 1                                 |
| X   | 5530688 | 5532706 | LOC119067009 | protein farnesyltransferase subunit beta                              |
| X   | 5533800 | 5545432 | LOC119067008 | cyclin G                                                              |
| X   | 5550449 | 5550761 | LOC119067007 | lncRNA                                                                |
| X   | 5557620 | 5561141 | LOC119067005 | uncharacterized LOC119067005                                          |
| X   | 5564541 | 5570403 | LOC119066994 | kinesin-like protein Nod                                              |
| X   | 5571313 | 5574392 | LOC119067014 | uncharacterized LOC119067014                                          |
| X   | 5572958 | 5573449 | LOC119067015 | lncRNA                                                                |
| X   | 5583226 | 5588388 | LOC119067017 | uncharacterized LOC119067017                                          |
| X   | 5598102 | 5639348 | LOC119067016 | regulator of G-protein signaling 9                                    |
| X   | 5645805 | 5665544 | LOC119066993 | uncharacterized LOC119066993                                          |
| X   | 5690809 | 5697035 | LOC119070114 | cytochrome c1                                                         |
| X   | 5699343 | 5700120 | LOC119070109 | lncRNA                                                                |
| X   | 5707253 | 5722892 | LOC119070126 | plastin-1                                                             |
| X   | 5726821 | 5729416 | LOC119070142 | histone deacetylase complex subunit SAP30 homolog                     |
| X   | 5731320 | 5738467 | LOC119070124 | protein UBASH3A homolog                                               |
| X   | 5739860 | 5744992 | LOC119070144 | uncharacterized LOC119070144                                          |

|   |         |         |              |                                                   |
|---|---------|---------|--------------|---------------------------------------------------|
| X | 5750829 | 5754225 | LOC119070135 | nuclear transcription factor Y subunit gamma-like |
| X | 5825210 | 5838009 | LOC119070150 | lncRNA                                            |
| X | 5831123 | 5860429 | LOC119070117 | ras-responsive element-binding protein 1          |
| X | 5842684 | 5844659 | LOC119070129 | protein I'm not dead yet-like                     |

*FBR1* was defined as X:4617817-5858425:*FBR1*. The FBR regions used were as broadly defined as possible to include all possible genes of interest. The coordinates of each gene within the region is given. Gene ID corresponds to NCBI's RefSeq annotation of *Bcop\_v1*, but the gene coordinates are shown for *Bcop\_v2*. The associated functional information is simply what putative orthologous protein assignment was given by NCBI during their annotation process.

**Supplemental Table S2. Genes within broadly-defined FBR2 boundaries.**

| Chr | Start    | End      | ID           | Associated Functional Information                       |
|-----|----------|----------|--------------|---------------------------------------------------------|
| X   | 14941994 | 14980081 | LOC119070023 | mucin-19                                                |
| X   | 15020528 | 15025840 | LOC119070028 | telomerase-binding protein EST1A                        |
| X   | 15025879 | 15026846 | LOC119070029 | ribosome maturation protein SBDS                        |
| X   | 15028467 | 15035685 | LOC119070026 | protein phosphatase Slingshot                           |
| X   | 15029173 | 15029731 | LOC119070027 | lncRNA                                                  |
| X   | 15044391 | 15052048 | LOC119070061 | glutamate receptor ionotropic kainate 2                 |
| X   | 15058881 | 15072732 | LOC119070063 | uncharacterized LOC119070063                            |
| X   | 15085802 | 15088529 | LOC119070064 | uncharacterized LOC119070064                            |
| X   | 15090150 | 15092181 | LOC119070041 | uncharacterized LOC119070041                            |
| X   | 15093008 | 15095408 | LOC119070055 | uncharacterized LOC119070055                            |
| X   | 15098283 | 15099010 | LOC119070056 | lncRNA                                                  |
| X   | 15105248 | 15110168 | LOC119070054 | alpha/beta hydrolase domain-containing protein 17B-like |
| X   | 15112056 | 15114506 | LOC119070036 | solute carrier family 25 member 45-like                 |
| X   | 15117031 | 15118828 | LOC119070038 | mitochondrial basic amino acids transporter-like        |
| X   | 15120198 | 15121710 | LOC119070060 | 2-methylene-furan-3-one reductase-like                  |
| X   | 15122667 | 15124189 | LOC119070059 | uncharacterized LOC119070059                            |
| X   | 15125094 | 15131673 | LOC119070057 | protein GPR107                                          |
| X   | 15139899 | 15302569 | LOC119070042 | uncharacterized LOC119070042                            |
| X   | 15149555 | 15158633 | LOC119070050 | lncRNA                                                  |
| X   | 15172267 | 15173730 | LOC119070045 | poly(3-hydroxyalkanoate) depolymerase C-like            |
| X   | 15187588 | 15197624 | LOC119070049 | parkin coregulated gene protein homolog                 |
| X   | 15208761 | 15210819 | LOC119070043 | uncharacterized LOC119070043                            |
| X   | 15300963 | 15313890 | LOC119070046 | mitochondrial dicarboxylate carrier                     |
| X   | 15303880 | 15310855 | LOC119070047 | uncharacterized LOC119070047                            |
| X   | 15341498 | 15435604 | LOC119070065 | pyrokinin-1 receptor-like                               |
| X   | 15436104 | 15438709 | LOC119070066 | T-complex protein 1 subunit alpha-like                  |
| X   | 15451951 | 15466295 | LOC119070052 | glutamyl aminopeptidase                                 |
| X   | 15521731 | 15523213 | LOC119069401 | uncharacterized LOC119069401                            |
| X   | 15528862 | 15529735 | LOC119069400 | uncharacterized LOC119069400                            |
| X   | 15532893 | 15534365 | LOC119069398 | upstream activation factor subunit spp27                |
| X   | 15626340 | 15628004 | LOC119070108 | uncharacterized LOC119070108                            |
| X   | 15650107 | 15650325 | LOC119070107 | lncRNA                                                  |
| X   | 15651083 | 15651301 | LOC119070106 | lncRNA                                                  |
| X   | 15672405 | 15678494 | LOC119070102 | sodium-independent sulfate anion transporter-like       |
| X   | 15678827 | 15681019 | LOC119070103 | uncharacterized LOC119070103                            |
| X   | 15683470 | 15684974 | LOC119070105 | trypsin alpha-3-like                                    |
| X   | 15685777 | 15688809 | LOC119070104 | trypsin-like                                            |
| X   | 15691863 | 15692322 | LOC119070040 | uncharacterized N-acetyltransferase YjgM-like           |
| X   | 15696063 | 15699160 | LOC119070101 | STAM-binding protein                                    |
| X   | 15705364 | 15706167 | LOC119070099 | lncRNA                                                  |
| X   | 15709070 | 15721953 | LOC119070098 | calcium-binding mitochondrial carrier protein Aralar1   |
| X   | 15723383 | 15724930 | LOC119070097 | uncharacterized LOC119070097                            |
| X   | 15729684 | 15750334 | LOC119070096 | corticotropin-releasing factor-binding protein          |
| X   | 15737294 | 15741918 | LOC119070095 | uncharacterized LOC119070095                            |
| X   | 15752952 | 15758923 | LOC119070094 | probable peroxisomal acyl-coenzyme A oxidase 1          |
| X   | 15773943 | 15798358 | LOC119070093 | lncRNA                                                  |
| X   | 15775352 | 15797304 | LOC119070091 | acyl-CoA desaturase-like                                |
| X   | 15800630 | 15802787 | LOC119070092 | venom serine protease-like                              |
| X   | 15808932 | 15809300 | LOC119070090 | lncRNA                                                  |

|   |          |          |              |                                                                                  |
|---|----------|----------|--------------|----------------------------------------------------------------------------------|
| X | 15809429 | 15810572 | LOC119070088 | DNA polymerase interacting tetratricopeptide repeat-containing protein of 47 kDa |
| X | 15811078 | 15812750 | LOC119070087 | probable phenylalanine--tRNA ligase mitochondrial                                |
| X | 15814469 | 15816269 | LOC119070086 | trans-Golgi network integral membrane protein 2-like                             |
| X | 15830359 | 15832130 | LOC119070039 | tRNA pseudouridine(38/39) synthase;start_range=.,176999                          |
| X | 15835426 | 15835776 | LOC119070089 | lncRNA                                                                           |
| X | 15839985 | 15853681 | LOC119070084 | ubiquitin carboxyl-terminal hydrolase puf                                        |
| X | 15856802 | 15858611 | LOC119070083 | uncharacterized LOC119070083                                                     |
| X | 15859818 | 15862488 | LOC119070082 | presenilin homolog                                                               |
| X | 15863724 | 15866154 | LOC119070081 | WD40 repeat-containing protein SMU1                                              |
| X | 15867872 | 15872533 | LOC119070080 | alpha-mannosidase 2                                                              |
| X | 15876532 | 15944404 | LOC119070077 | espin                                                                            |
| X | 15886314 | 15887402 | LOC119070079 | uncharacterized protein C9orf85 homolog                                          |
| X | 15946809 | 15949511 | LOC119070071 | another transcription unit protein                                               |
| X | 15949503 | 15950687 | LOC119070074 | tRNA (cytosine(38)-C(5))-methyltransferase                                       |
| X | 15951281 | 15956954 | LOC119070073 | uncharacterized LOC119070073                                                     |
| X | 15964775 | 15970332 | LOC119070076 | probable nuclear transport factor 2                                              |
| X | 15971308 | 15972414 | LOC119070075 | haloacid dehalogenase-like hydrolase domain-containing protein 2                 |
| X | 15972501 | 15978458 | LOC119070069 | splicing factor 3B subunit 1                                                     |
| X | 15981523 | 15985621 | LOC119070072 | uncharacterized LOC119070072                                                     |
| X | 15987288 | 15992222 | LOC119070068 | actin-5C                                                                         |
| X | 16016851 | 16020658 | LOC119068117 | syndetin                                                                         |
| X | 16027366 | 16029709 | LOC119068062 | lncRNA                                                                           |
| X | 16056213 | 16113642 | LOC119068048 | uncharacterized LOC119068048                                                     |

*FBR2 was defined as X:14956213-16058975:FBR2. The FBR regions used were as broadly defined as possible to include all possible genes of interest. The coordinates of each gene within the region is given. Gene ID corresponds to NCBI's RefSeq annotation of Bcop\_v1, but the gene coordinates are shown for Bcop\_v2. The associated functional information is simply what putative orthologous protein assignment was given by NCBI during their annotation process.*



**Supplemental Table S3. Genes within broadly-defined FBR3 boundaries.**

| Chr | Start    | End      | ID           | Associated Functional Information                                |
|-----|----------|----------|--------------|------------------------------------------------------------------|
| X   | 57743177 | 57759852 | LOC119085695 | probable cytochrome P450 28d1                                    |
| X   | 57754722 | 57777203 | LOC119085691 | sodium-coupled monocarboxylate transporter 1-like                |
| X   | 57762921 | 57767083 | LOC119085693 | sodium-coupled monocarboxylate transporter 1-like                |
| X   | 57768291 | 57779281 | LOC119085698 | lncRNA                                                           |
| X   | 57772527 | 57774533 | LOC119085697 | sodium-coupled monocarboxylate transporter 1-like                |
| X   | 57786916 | 57788756 | LOC119085655 | serine/threonine-protein kinase Warts-like                       |
| X   | 57796957 | 57797892 | LOC119085654 | serine/threonine-protein kinase Warts-like                       |
| X   | 57804904 | 57858764 | LOC119085644 | serine/threonine-protein kinase Warts-like                       |
| X   | 57817368 | 57830424 | LOC119085645 | lncRNA                                                           |
| X   | 57861375 | 57861864 | LOC119080333 | ctenidin-1-like                                                  |
| X   | 57863966 | 57865369 | LOC119085728 | WD repeat-containing protein 61                                  |
| X   | 57865427 | 57866518 | LOC119085729 | protein NDUFAF4 homolog                                          |
| X   | 57869843 | 57870527 | LOC119085721 | uncharacterized LOC119085721                                     |
| X   | 57872522 | 57873422 | LOC119085653 | uncharacterized LOC119085653                                     |
| X   | 57874301 | 57882770 | LOC119085706 | neuralized-like protein 4                                        |
| X   | 57879098 | 57879170 |              | tRNA                                                             |
| X   | 57897190 | 57897262 |              | tRNA                                                             |
| X   | 57917771 | 57918430 | LOC119085643 | lncRNA                                                           |
| X   | 57932507 | 57938134 | LOC119085713 | cytochrome P450 3A2-like                                         |
| X   | 57938378 | 57949865 | LOC119085711 | cytochrome P450 4d1-like                                         |
| X   | 57951304 | 57972365 | LOC119085714 | lncRNA                                                           |
| X   | 57951445 | 57954026 | LOC119085712 | cytochrome P450 4d1-like                                         |
| X   | 58014747 | 58015823 | LOC119080397 | thiopurine S-methyltransferase-like                              |
| X   | 58077825 | 58102369 | LOC119081066 | lncRNA                                                           |
| X   | 58091753 | 58092418 | LOC119081059 | lncRNA                                                           |
| X   | 58156161 | 58159064 | LOC119085652 | uncharacterized LOC119085652                                     |
| X   | 58188826 | 58243636 | LOC119081069 | F-actin-monooxygenase Mical                                      |
| X   | 58195622 | 58202717 | LOC119081098 | carboxymethylenebutenolidase homolog                             |
| X   | 58245423 | 58256907 | LOC119081088 | palmitoyltransferase ZDHHC6                                      |
| X   | 58264482 | 58289540 | LOC119080403 | acetylcholinesterase-like;start_range=.,2701                     |
| X   | 58293917 | 58322925 | LOC119069722 | acetylcholinesterase                                             |
| X   | 58348605 | 58363237 | LOC119069708 | CRISP/Allergen/PR-1                                              |
| X   | 58366187 | 58607377 | LOC119069857 | protein timeless homolog                                         |
| X   | 58440299 | 58443346 | LOC119069858 | calcium-activated chloride channel regulator 1-like              |
| X   | 58483092 | 58506981 | LOC119069862 | lncRNA                                                           |
| X   | 58485475 | 58527685 | LOC119069856 | uncharacterized LOC119069856                                     |
| X   | 58530201 | 58530918 | LOC119069861 | lncRNA                                                           |
| X   | 58612542 | 58614675 | LOC119069859 | endoglucanase A-like                                             |
| X   | 58646655 | 58647918 | LOC119069860 | uncharacterized LOC119069860                                     |
| X   | 58648914 | 58649948 | LOC119069855 | leucine-rich repeat-containing G-protein coupled receptor 5-like |
| X   | 58650746 | 58651781 | LOC119069854 | uncharacterized LOC119069854                                     |

*FBR3 was defined as X:57757173-58653168:FBR3. The FBR regions used were as broadly defined as possible to include all possible genes of interest. The coordinates of each gene within the region is given. Gene ID corresponds to NCBI's RefSeq annotation of Bcop\_v1, but the gene coordinates are shown for Bcop\_v2. The associated functional information is simply what putative orthologous protein assignment was given by NCBI during their annotation process.*

**Supplemental Table S4. Narrow estimates of interacting regions using interaction frequency summits.**

| Region         | Summit Coordinates         | Summit Candidate | Support    | Supporting Interactions                                   |
|----------------|----------------------------|------------------|------------|-----------------------------------------------------------|
| <b>5pINVbp</b> | <b>X:4856672-4891117</b>   | <b>1</b>         | <b>1/1</b> | <b>XpX-INV-1</b>                                          |
| <b>FBR1</b>    | <b>X:4994450-5028895</b>   | <b>1</b>         | <b>3/5</b> | <b>XpX-FBR1-FBR3-1, XO-FBRas1-FBR3-1, XO-FBR1b-FBR2-1</b> |
| FBR1           | X:5270006-5304451          | 2                | 1/5        | XpX-FBR1-FBR2-1                                           |
| FBR1           | X:5304451-5338895          | 3                | 1/5        | XO-FBR1a-FBR2-1                                           |
| <b>FBR2</b>    | <b>X:15500019-15534463</b> | <b>1</b>         | <b>3/5</b> | <b>XO-FBR2-FBR3-1, XpX-FBR1-FBR2-2, XpX-FBR2-FBR3-1</b>   |
| FBR2           | X:15534463-15568907        | 2                | 1/5        | XO-FBR1b-FBR2-2                                           |
| FBR2           | X:15603352-15637796        | 3                | 1/5        | XO-FBR1a-FBR2-2                                           |
| <b>FBR3</b>    | <b>X:58142292-58176736</b> | <b>1</b>         | <b>2/4</b> | <b>XpX-FBR1-FBR3-2, XO-FBR1-FBR3-2</b>                    |
| FBR3           | X:58176736-58211181        | 2                | 1/4        | XO-FBR2-FBR3-2                                            |
| FBR3           | X:58211181-58245625        | 3                | 1/4        | XpX-FBR2-FBR3-2                                           |
| <b>3pINVbp</b> | <b>X:62861186-62895631</b> | <b>1</b>         | <b>1/1</b> | <b>XpX-INV-2</b>                                          |

*These are narrow estimates of the pairs of loci that interact. Within broader domains (cluster peaks), these are the sub-regions with the highest interaction frequencies (or peak summits).*

*There were two Hi-C samples analyzed: XO male pupae (XO) and X'X adult females (XpX).*

*There is a single summit estimate for each inversion breakpoint. However, each FBR is involved in two interactions per sample across two samples. Moreover, we took two estimates for FBR1 from the male XO sample since the second candidate matched that learned from the XpX sample.*

*Thus, there could mean up to 4 summit candidates each FBR. The support number refers to the fraction of supporting interactions across samples that gave the same summit. The Supporting Interactions detail what samples and what interacting regions supported the summit. For each region, the summit with strongest support is shown in bold.*

## Supplemental Table S5. Genes at FBR and long paracentric inversion breakpoint

interaction frequency summits.

| Interaction Region | Summit Candidate | Gene Distance | Gene ID         | Gene Coordinates    | Associated Functional Info                              |
|--------------------|------------------|---------------|-----------------|---------------------|---------------------------------------------------------|
| 5pINVbp            | 1                | 0             | LOC119067079    | X:4865845-4869812   | IQ and ubiquitin-like domain-containing protein         |
| 5pINVbp            | 1                | 0             | LOC119067081    | X:4862162-4865889   | FAST kinase domain-containing protein 4                 |
| 5pINVbp            | 1                | 0             | LOC119067082    | X:4881319-4894576   | protein phosphatase PP2A 55 kDa regulatory subunit      |
| FBR1               | 1                | 0             | LOC119067075    | X:5016878-5076694   | mushroom body large-type Kenyon cell-specific protein 1 |
| FBR1               | 1                | 0             | LOC119067088    | X:4954286-4996863   | 5-hydroxytryptamine receptor 1-like                     |
| FBR1               | 2                | 0             | LOC119067095*   | X:5261380-5279772   | lncRNA                                                  |
| FBR1               | 3                | -24680        | LOC119067095*   | X:5261380-5279772   | lncRNA                                                  |
| FBR2               | 1                | 0             | LOC119069398**  | X:15532893-15534365 | upstream activation factor subunit spp27                |
| FBR2               | 1                | 0             | LOC119069400    | X:15528862-15529735 | uncharacterized LOC119069400                            |
| FBR2               | 1                | 0             | LOC119069401    | X:15521731-15523213 | uncharacterized LOC119069401                            |
| FBR2               | 2                | -99           | LOC119069398**  | X:15532893-15534365 | upstream activation factor subunit spp27                |
| FBR2               | 3                | 0             | LOC119070108    | X:15626340-15628004 | uncharacterized LOC119070108                            |
| FBR3               | 1                | 0             | LOC119085652    | X:58156161-58159064 | uncharacterized LOC119085652                            |
| FBR3               | 2                | 0             | LOC119081069*** | X:58188821-58243636 | F-actin-monooxygenase Mical                             |
| FBR3               | 2                | 0             | LOC119081098    | X:58195622-58202717 | carboxymethylenebutenolidase homolog                    |
| FBR3               | 3                | 0             | LOC119081069*** | X:58188821-58243636 | F-actin-monooxygenase Mical                             |
| FBR3               | 3                | 0             | LOC119081088    | X:58245423-58256907 | palmitoyltransferase ZDHHC6                             |
| 3pINVbp            | 1                | 0             | LOC119069629    | X:62848697-62862727 | rapamycin-insensitive companion of mTOR                 |
| 3pINVbp            | 1                | 0             | LOC119069633    | X:62884193-62893941 | histone-lysine N-methyltransferase Suv4-20              |
| 3pINVbp            | 1                | 0             | LOC119069637    | X:62865320-62877204 | cytochrome P450 4d1-like                                |
| 3pINVbp            | 1                | 0             | LOC119069648    | X:62864133-62865362 | protein FAM32A-like                                     |

Interaction region is specific FBR (or long paracentric inversion breakpoint). Summit candidate is as defined for

each interaction region in Supplemental Table S6. For each, summit candidate 1 had most support. The genes

closest to each region are reported. Gene distance corresponds to how far away from the region coordinates the

gene is, where 0 means it is within the region, negative numbers are upstream, and positive downstream of region

boundaries. Gene ID corresponds to NCBI's RefSeq annotation of *Bcop\_v1*, but the gene coordinates are shown for

*Bcop\_v2*. The associated functional information is simply what putative orthologous protein assignment was given

by NCBI during their annotation process.

**Supplemental Table S6. Approximate Mb Distance between interacting loci of “extra dots” on X and IV.**

| Dot      | Approximate Mb Distance between interacting loci |
|----------|--------------------------------------------------|
| X-dot-1  | 55                                               |
| X-dot-2  | 41                                               |
| X-dot-3  | 49                                               |
| X-dot-4  | 39                                               |
| X-dot-5  | 28                                               |
| X-dot-6  | 29                                               |
| X-dot-7  | 8                                                |
| IV-dot-1 | 12                                               |

*Interaction region is the X-dot name as given in Supplemental Fig S7. There is only one IV-dot.*

**Supplemental Table S7. Genes found within X-dot-1 interaction regions.**

| Interaction Region | Region Coordinates  | Gene Distance | Gene ID      | Gene Coordinates    | Associated functional info.                       |
|--------------------|---------------------|---------------|--------------|---------------------|---------------------------------------------------|
| X-dot-1-1          | X:5720579-5789502   | 0             | LOC119070124 | X:5731320-5738467   | protein UBASH3A homolog                           |
| X-dot-1-1          | X:5720579-5789502   | 0             | LOC119070142 | X:5726821-5729416   | histone deacetylase complex subunit SAP30 homolog |
| X-dot-1-1          | X:5720579-5789502   | 0             | LOC119070135 | X:5750829-5754225   | nuclear transcription factor Y subunit gamma-like |
| X-dot-1-1          | X:5720579-5789502   | 0             | LOC119070126 | X:5707253-5722892   | plastin-1                                         |
| X-dot-1-1          | X:5720579-5789502   | 0             | LOC119070144 | X:5739860-5744992   | uncharacterized LOC119070144                      |
| X-dot-1-2          | X:61065460-61134383 | 0             | LOC119069759 | X:61131487-61142319 | lncRNA                                            |
| X-dot-1-2          | X:61065460-61134383 | 0             | LOC119069757 | X:61051512-61076636 | lncRNA                                            |
| X-dot-1-2          | X:61065460-61134383 | 0             | LOC119069730 | X:61088186-61093172 | uncharacterized LOC119069730                      |
| X-dot-1-2          | X:61065460-61134383 | 0             | LOC119069729 | X:61067304-61080301 | kinesin-like protein Klp98A                       |

*Interaction region is the X-dot name as given in Supplemental Fig S7, and whether it is the first or second region in the interaction. The coordinates of each region are given. These regions were the sub-regions of highest interaction frequency between the two loci. The genes closest to each region are reported. Gene distance corresponds to how far away from the region coordinates the gene is, where 0 means it is within the region. Gene ID corresponds to NCBI's RefSeq annotation of Bcop\_v1, but the gene coordinates are shown for Bcop\_v2. The associated functional information is simply what putative orthologous protein assignment was given by NCBI during their annotation process.*

**Supplemental Table S8. Genes found within X-dot-2 interaction regions.**

| Interaction Region | Region Coordinates  | Gene Distance | Gene ID      | Gene Coordinates    | Associated functional info.                             |
|--------------------|---------------------|---------------|--------------|---------------------|---------------------------------------------------------|
| X-dot-2-1          | X:11441158-11510081 | 0             | LOC119069117 | X:11502854-11509659 | F-box/LRR-repeat protein fbxl-1                         |
| X-dot-2-1          | X:11441158-11510081 | 0             | LOC119069118 | X:11495784-11500294 | WD repeat domain phosphoinositide-interacting protein 3 |
| X-dot-2-1          | X:11441158-11510081 | 0             | LOC119069119 | X:11488255-11489402 | tRNA-uridine aminocarboxypropyltransferase 1            |
| X-dot-2-1          | X:11441158-11510081 | 0             | LOC119069120 | X:11486337-11487001 | signal peptidase complex subunit 1                      |
| X-dot-2-1          | X:11441158-11510081 | 0             | LOC119069121 | X:11478332-11485466 | band 4.1-like protein 5                                 |
| X-dot-2-1          | X:11441158-11510081 | 0             | LOC119069122 | X:11472499-11474482 | actin-87E                                               |
| X-dot-2-1          | X:11441158-11510081 | 0             | LOC119069124 | X:11440885-11441749 | uncharacterized LOC119069124                            |
| X-dot-2-2          | X:52381207-52450130 | 0             | LOC119085308 | X:52429113-52433177 | uncharacterized LOC119085308                            |
| X-dot-2-2          | X:52381207-52450130 | 0             | LOC119085312 | X:52445680-52451577 | lncRNA                                                  |
| X-dot-2-2          | X:52381207-52450130 | 0             | LOC119085329 | X:52447651-52449164 | lncRNA                                                  |
| X-dot-2-2          | X:52381207-52450130 | 0             | LOC119085335 | X:52439152-52440564 | lncRNA                                                  |
| X-dot-2-2          | X:52381207-52450130 | 0             | LOC119085343 | X:52397951-52426733 | putative thiamine transporter SLC35F3                   |
| X-dot-2-2          | X:52381207-52450130 | 0             | LOC119085423 | X:52418394-52423109 | uncharacterized LOC119085423                            |
| X-dot-2-2          | X:52381207-52450130 | 0             | LOC119085433 | X:52394031-52396232 | protein C3orf33                                         |
| X-dot-2-2          | X:52381207-52450130 | 0             | LOC119085442 | X:52382796-52393385 | CTP synthase-like                                       |
| X-dot-2-2          | X:52381207-52450130 | 0             | LOC119085467 | X:52387325-52388438 | lncRNA                                                  |

*Interaction region is the X-dot name as given in Supplemental Fig S7, and whether it is the first or second region in the interaction. The coordinates of each region are given. These regions were the sub-regions of highest interaction frequency between the two loci. The genes closest to each region are reported. Gene distance corresponds to how far away from the region coordinates the gene is, where 0 means it is within the region. Gene ID corresponds to NCBI's RefSeq annotation of Bcop\_v1, but the gene coordinates are shown for Bcop\_v2. The associated functional information is simply what putative orthologous protein assignment was given by NCBI during their annotation process.*

**Supplemental Table S9. Genes found within X-dot-3 interaction regions.**

| Interaction Region | Region Coordinates  | Gene Distance | Gene ID      | Gene Coordinates    | Associated functional info.                             |
|--------------------|---------------------|---------------|--------------|---------------------|---------------------------------------------------------|
| X-dot-3-1          | X:11441158-11510081 | 0             | LOC119069117 | X:11502854-11509659 | F-box/LRR-repeat protein fbxl-1                         |
| X-dot-3-1          | X:11441158-11510081 | 0             | LOC119069118 | X:11495784-11500294 | WD repeat domain phosphoinositide-interacting protein 3 |
| X-dot-3-1          | X:11441158-11510081 | 0             | LOC119069119 | X:11488255-11489402 | tRNA-uridine aminocarboxypropyltransferase 1            |
| X-dot-3-1          | X:11441158-11510081 | 0             | LOC119069120 | X:11486337-11487001 | signal peptidase complex subunit 1                      |
| X-dot-3-1          | X:11441158-11510081 | 0             | LOC119069121 | X:11478332-11485466 | band 4.1-like protein 5                                 |
| X-dot-3-1          | X:11441158-11510081 | 0             | LOC119069122 | X:11472499-11474482 | actin-87E                                               |
| X-dot-3-1          | X:11441158-11510081 | 0             | LOC119069124 | X:11440885-11441749 | uncharacterized LOC119069124                            |
| X-dot-3-2          | X:60031621-60100543 | 0             | LOC119069764 | X:60072417-60107238 | serine/threonine-protein kinase 32A                     |
| X-dot-3-2          | X:60031621-60100543 | 0             | LOC119069765 | X:59993213-60057104 | inactive dipeptidyl peptidase 10-like                   |
| X-dot-3-2          | X:60031621-60100543 | 0             | LOC119069766 | X:60042619-60043531 | bombyxin C-1-like                                       |
| X-dot-3-2          | X:60031621-60100543 | 0             | LOC119069767 | X:60040039-60059176 | lncRNA                                                  |

*Interaction region is the X-dot name as given in Supplemental Fig S7, and whether it is the first or second region in the interaction. The coordinates of each region are given. These regions were the sub-regions of highest interaction frequency between the two loci. The genes closest to each region are reported. Gene distance corresponds to how far away from the region coordinates the gene is, where 0 means it is within the region. Gene ID corresponds to NCBI's RefSeq annotation of Bcop\_v1, but the gene coordinates are shown for Bcop\_v2. The associated functional information is simply what putative orthologous protein assignment was given by NCBI during their annotation process.*

**Supplemental Table S10. Genes found within X-dot-4 interaction regions.**

| Interaction Region | Region Coordinates  | Gene Distance | Gene ID      | Gene Coordinates    | Associated functional info.         |
|--------------------|---------------------|---------------|--------------|---------------------|-------------------------------------|
| X-dot-4-1          | X:13577760-13646683 | 0             | LOC119069895 | X:13631028-13719221 | sex determination protein fruitless |
| X-dot-4-1          | X:13577760-13646683 | 0             | LOC119069899 | X:13619455-13620308 | C-type lectin 37Db-like             |
| X-dot-4-1          | X:13577760-13646683 | 0             | LOC119069903 | X:13579837-13596288 | lncRNA                              |
| X-dot-4-2          | X:52656898-52725821 | 0             | LOC119085108 | X:52655868-52722399 | uncharacterized LOC119085108        |
| X-dot-4-2          | X:52656898-52725821 | 0             | LOC119085137 | X:52639114-52740107 | uncharacterized LOC119085137        |

*Interaction region is the X-dot name as given in Supplemental Fig S7, and whether it is the first or second region in the interaction. The coordinates of each region are given. These regions were the sub-regions of highest interaction frequency between the two loci. The genes closest to each region are reported. Gene distance corresponds to how far away from the region coordinates the gene is, where 0 means it is within the region. Gene ID corresponds to NCBI's RefSeq annotation of Bcop\_v1, but the gene coordinates are shown for Bcop\_v2. The associated functional information is simply what putative orthologous protein assignment was given by NCBI during their annotation process.*



**Supplemental Table S11. Genes found within X-dot-5 interaction regions.**

| Interaction Region | Region Coordinates  | Gene Distance | Gene ID      | Gene Coordinates    | Associated functional info.  |
|--------------------|---------------------|---------------|--------------|---------------------|------------------------------|
| X-dot-5-1          | X:26052758-26121681 | 0             | LOC119068645 | X:26084527-26125653 | proton channel OtopLc        |
| X-dot-5-1          | X:26052758-26121681 | 0             | LOC119068646 | X:26055260-26067017 | uncharacterized LOC119068646 |
| X-dot-5-2          | X:54104273-54173196 | 0             | LOC119084022 | X:54083799-54218142 | aminopeptidase N             |
| X-dot-5-2          | X:54104273-54173196 | 0             | LOC119084034 | X:54118226-54126574 | myosin-1-like                |
| X-dot-5-2          | X:54104273-54173196 | 0             | LOC119084041 | X:54135371-54139896 | uncharacterized LOC119084041 |
| X-dot-5-2          | X:54104273-54173196 | 0             | LOC119084060 | X:54106794-54111456 | uncharacterized LOC119084060 |
| X-dot-5-2          | X:54104273-54173196 | 0             | LOC119084116 | X:54173106-54177132 | uncharacterized LOC119084116 |
| X-dot-5-2          | X:54104273-54173196 | 0             | LOC119084127 | X:54168537-54170103 | uncharacterized LOC119084127 |
| X-dot-5-2          | X:54104273-54173196 | 0             | LOC119085667 | X:54169975-54171186 | uncharacterized LOC119085667 |
| X-dot-5-2          | X:54104273-54173196 | 0             | LOC119085668 | X:54133316-54134916 | uncharacterized LOC119085668 |

*Interaction region is the X-dot name as given in Supplemental Fig S7, and whether it is the first or second region in the interaction. The coordinates of each region are given. These regions were the sub-regions of highest interaction frequency between the two loci. The genes closest to each region are reported. Gene distance corresponds to how far away from the region coordinates the gene is, where 0 means it is within the region. Gene ID corresponds to NCBI's RefSeq annotation of Bcop\_v1, but the gene coordinates are shown for Bcop\_v2. The associated functional information is simply what putative orthologous protein assignment was given by NBCI during their annotation process.*

**Supplemental Table S12. Genes found within X-dot-6 interaction regions.**

| Interaction Region | Region Coordinates  | Gene Distance | Gene ID      | Gene Coordinates    | Associated functional info.                           |
|--------------------|---------------------|---------------|--------------|---------------------|-------------------------------------------------------|
| X-dot-6-1          | X:27086598-27155521 | 0             | LOC119068853 | X:27114485-27176903 | partitioning defective 3 homolog                      |
| X-dot-6-1          | X:27086598-27155521 | 0             | LOC119068861 | X:27104379-27107357 | coiled-coil domain-containing protein 186             |
| X-dot-6-1          | X:27086598-27155521 | 0             | LOC119068870 | X:27102759-27109686 | allantoinase                                          |
| X-dot-6-1          | X:27086598-27155521 | 0             | LOC119068880 | X:27110979-27112289 | uncharacterized LOC119068880                          |
| X-dot-6-1          | X:27086598-27155521 | 0             | LOC119068881 | X:27085637-27096036 | cyclic AMP response element-binding protein B         |
| X-dot-6-1          | X:27086598-27155521 | 0             | LOC119068895 | X:27099377-27101069 | lncRNA                                                |
| X-dot-6-2          | X:56240875-56309798 | 0             | LOC119082597 | X:56294010-56309659 | progesterone and adipoQ receptor family member 4      |
| X-dot-6-2          | X:56240875-56309798 | 0             | LOC119085662 | X:56226095-56248115 | probable serine/threonine-protein kinase DDB_G0282963 |

*Interaction region is the X-dot name as given in Supplemental Fig S7, and whether it is the first or second region in the interaction. The coordinates of each region are given. These regions were the sub-regions of highest interaction frequency between the two loci. The genes closest to each region are reported. Gene distance corresponds to how far away from the region coordinates the gene is, where 0 means it is within the region. Gene ID corresponds to NCBI's RefSeq annotation of Bcop\_v1, but the gene coordinates are shown for Bcop\_v2. The associated functional information is simply what putative orthologous protein assignment was given by NCBI during their annotation process.*

**Supplemental Table S13. Genes found within X-dot-7 interaction regions.**

| Interaction Region | Region Coordinates  | Gene Distance | Gene ID      | Gene Coordinates    | Associated functional info.           |
|--------------------|---------------------|---------------|--------------|---------------------|---------------------------------------|
| X-dot-7-1          | X:52312285-52381207 | 0             | LOC119085485 | X:52356775-52358594 | uncharacterized LOC119085485          |
| X-dot-7-1          | X:52312285-52381207 | 0             | LOC119085529 | X:52273536-52316850 | uncharacterized LOC119085529          |
| X-dot-7-1          | X:52312285-52381207 | 0             | LOC119085513 | X:52319529-52321223 | uncharacterized LOC119085513          |
| X-dot-7-1          | X:52312285-52381207 | 0             | LOC119085503 | X:52325927-52328518 | neprilysin-2-like                     |
| X-dot-7-1          | X:52312285-52381207 | 0             | LOC119085457 | X:52378068-52379883 | lncRNA                                |
| X-dot-7-1          | X:52312285-52381207 | 0             | LOC119085477 | X:52366806-52368404 | HSPB1-associated protein 1            |
| X-dot-7-1          | X:52312285-52381207 | 0             | LOC119085676 | X:52371744-52375851 | ionotropic receptor 40a               |
| X-dot-7-1          | X:52312285-52381207 | 0             | LOC119085495 | X:52352709-52353674 | copper metallothionein 2-like         |
| X-dot-7-2          | X:60031621-60100543 | 0             | LOC119069767 | X:60040039-60059176 | lncRNA                                |
| X-dot-7-2          | X:60031621-60100543 | 0             | LOC119069766 | X:60042619-60043531 | bombyxin C-1-like                     |
| X-dot-7-2          | X:60031621-60100543 | 0             | LOC119069765 | X:59993213-60057104 | inactive dipeptidyl peptidase 10-like |
| X-dot-7-2          | X:60031621-60100543 | 0             | LOC119069764 | X:60072417-60107238 | serine/threonine-protein kinase 32A   |

*Interaction region is the X-dot name as given in Supplemental Fig S7, and whether it is the first or second region in the interaction. The coordinates of each region are given. These regions were the sub-regions of highest interaction frequency between the two loci. The genes closest to each region are reported. Gene distance corresponds to how far away from the region coordinates the gene is, where 0 means it is within the region. Gene ID corresponds to NCBI's RefSeq annotation of Bcop\_v1, but the gene coordinates are shown for Bcop\_v2. The associated functional information is simply what putative orthologous protein assignment was given by NCBI during their annotation process.*

**Supplemental Table S14. Genes found within IV-dot-1 interaction regions.**

| Interaction Region | Region Coordinates   | Gene Distance | Gene ID      | Gene Coordinates     | Associated functional info.               |
|--------------------|----------------------|---------------|--------------|----------------------|-------------------------------------------|
| IV-dot-1-1         | IV:16504291-16551717 | 0             | LOC119070788 | IV:16494459-16583728 | schwannomin-interacting protein 1 homolog |
| IV-dot-1-1         | IV:16504291-16551717 | 0             | LOC119070790 | IV:16527154-16528867 | probable proline iminopeptidase           |
| IV-dot-1-1         | IV:16504291-16551717 | 0             | LOC119070791 | IV:16535626-16537156 | probable proline iminopeptidase           |
| IV-dot-1-1         | IV:16504291-16551717 | 0             | LOC119070792 | IV:16523895-16539013 | probable proline iminopeptidase           |
| IV-dot-1-2         | IV:28408248-28455674 | 0             | LOC119075328 | IV:28408885-28411082 | benzoate 4-monooxygenase-like             |
| IV-dot-1-2         | IV:28408248-28455674 | 0             | LOC119075328 | IV:28408885-28411082 | benzoate 4-monooxygenase-like             |
| IV-dot-1-2         | IV:28408248-28455674 | 0             | LOC119075409 | IV:28443702-28473808 | dynein heavy chain 7 axonemal             |
| IV-dot-1-2         | IV:28408248-28455674 | 0             | LOC119075409 | IV:28443702-28473808 | dynein heavy chain 7 axonemal             |
| IV-dot-1-2         | IV:28408248-28455674 | 0             | LOC119075410 | IV:28447205-28465067 | lncRNA                                    |
| IV-dot-1-2         | IV:28408248-28455674 | 0             | LOC119075410 | IV:28447205-28465067 | lncRNA                                    |

*Interaction region is the IV-dot name – only one was explored. The coordinates of each region are given. These regions were the sub-regions of highest interaction frequency between the two loci. The genes closest to each region are reported. Gene distance corresponds to how far away from the region coordinates the gene is, where 0 means it is within the region. Gene ID corresponds to NCBI's RefSeq annotation of Bcop\_v1, but the gene coordinates are shown for Bcop\_v2. The associated functional information is simply what putative orthologous protein assignment was given by NBCI during their annotation process.*

## **Supplemental References**

1. Urban JM, Foulk MS, Bliss JE, Coleman CM, Lu N, Mazloom R, et al. High contiguity de novo genome assembly and DNA modification analyses for the fungus fly, *Sciara coprophila*, using single-molecule sequencing. *BMC Genomics* 2021 221. 2021;22:1–23.
2. Lieberman-Aiden E, Van Berkum NL, Williams L, Imakaev M, Ragoczy T, Telling A, et al. Comprehensive mapping of long-range interactions reveals folding principles of the human genome. *Science* (80- ). 2009;326:289–93.
3. Urban JM, Bateman JR, Garza KR, Borden J, Jain J, Brown A, et al. *Bradysia* (*Sciara*) *coprophila* larvae up-regulate DNA repair pathways and down-regulate developmental regulators in response to ionizing radiation. *Genetics*. 2023. <https://doi.org/10.1093/GENETICS/IYAD208>.
4. Feyereisen R, Urban JM, Nelson DR. Aliens in the CYPome of the black fungus gnat, *Bradysia coprophila*. *Insect Biochem Mol Biol*. 2023;159:103965.
5. Urban JM. *Bradysia coprophila* genome annotations Bcop\_v1.0. USDA Ag Data Commons. 2021. <https://doi.org/10.15482/USDA.ADC/1522618>.
6. NCBI. *Bradysia coprophila* Annotation Release 100. NCBI Eukaryotic Genome Annotation Pipeline. [https://www.ncbi.nlm.nih.gov/genome/annotation\\_euk/Bradysia\\_coprophila/100/](https://www.ncbi.nlm.nih.gov/genome/annotation_euk/Bradysia_coprophila/100/).
7. da Cunha PR, Granadino B, Perondini AL, Sánchez L. Dosage compensation in sciarids is achieved by hypertranscription of the single X chromosome in males. *Genetics*. 1994;138:787–90.
8. Baird RB, Urban JM, Mongue AJ, Jaron KS, Hodson CN, Grewoldt M, et al. Recent Evolution of a Maternally Acting Sex-Determining Supergene in a Fly with Single-Sex Broods. *Mol Biol Evol*. 2023;40.
9. Layer RM, Chiang C, Quinlan AR, Hall IM. LUMPY: a probabilistic framework for structural variant discovery. *Genome Biol*. 2014;15:R84.

10. Pedersen BS, R. L, Quilan A. smooove: structural-variant calling and genotyping with existing tools. Available from: <https://github.com/brentp/smoove>. 2020.
